# Supplementary material
Source: publisher figshare collection journal article supplement (https://gsajournals.figshare.com/ndownloader/files/15459584)
Supplement: Supplementary file 1 [file 15459584]

**Supplementary Table S6**. Compilation of the ten mutations identified in the sequenced region of *An-1* gene. Mutations n2*, n4*, and n6* are functional nucleotide polymorphisms (FNPs) identified in Luo *et al.* (2013) study.

| Rice type | Presence of Awn | Sample Name | Haplo-type | n1 | n2 * | n3 | n4* | n5 | n6* | n7 | n8 | n9 | n10 |
| --- | --- | --- | --- | --- | --- | --- | --- | --- | --- | --- | --- | --- | --- |
|  | Coordinate based on PCR fragment (this study) | | | 19 | 118 | 140 | 323 | 381 | 389 | 423 | 449 | 463 | 464 |
| Japonica | Awnless | Nipponbare  Luo et al. 2013 (haplotype equivalent to H4 in the present study) | *an-1(Tn+)* | G | GCC | C | C | G | G | G | A | T | - |
| Indica | Awnless | HP228  Luo et al. 2013 (haplotype equivalent to H1 in the present study) | *an-1(G-)* | G | GCC | C | C | G | - | G | A | T | - |
| Wild rice *O. rufipogon* | Awned | W1943  Luo et al. 2013 (haplotype equivalent to H7 in the present study) | *An-1* | G | - | C | G | G | G | G | A | T | T |
| Sabah Cultivar  (n=5) | Awnless | MKCV02, LBCV05, LBCV23, TTCV01, MKCV04 | H1  (n=5) | G | GCC | C | C | G | - | G | A | T | - |
| PM Cultivar  (n=10) | Awnless | MR211, MR220, MR249, MR219-02, MR219-03, MR219-10, MR219-11, MR220-01, MR220-02, MR220-03 | H2  (n=10) | G | - | T | G | G | G | G | A | T | T |
| Sabah weedy rice (n=34) | Awnless | SH-SBNTH11, SH-SBMS09,  SH-SBTT15, SH-SBTT07,  SH-SBTT01, SH-SBTT10,  SH-SBTT04, SH-SBNTH08,  SH-SBNTH32, SH-SBNTH29,  SH-SBTW10, BR-SBNT18,  BR-SBTA03, BR-SBTA05 | H1  (n=14) | G | GCC | C | C | G | - | G | A | T | - |
|  |  | SH-SBMS13 | H2  (n=1) | G | - | T | G | G | G | G | A | T | T |
|  |  | BR-SBTA21, SH-SBMK05,  BR-SBTW07, SH-SBMK04,  SH-SBNTH19, BR-SBTW02,  SH-SBMK01, BR-SBMK02,  BR-SBMS07, BR-SBMS26,  BR-SBMS27, BR-SBTA13,  BR-SBTA16, BR-SBTS14,  BR-SBTW05 | H3  (n=15) | G | GCC | C | C | C | G | G | A | T | - |
|  |  | BR-SBBG03, BR-SBMS25  BR-SBTW13, SH-SBTW03 | H4  (n=4) | G | GCC | C | C | G | G | G | A | T | - |
| Sabah weedy rice (n=19) | Awned | SHA-SBBG23, SHA-SBMS24,  SHA-SBTS02, SHA-SBMS15,  SHA-SBBG20,  BRA-SBBG16, SHA-SBMS23, SHA-SBMS11,  SHA-SBMS17, SHA-SBNT14,  BRA-SBTA25, SHA-SBBG43 | H1  (n=12) | G | GCC | C | C | G | - | G | A | T | - |
|  |  | SHA-SBKS04a, BRA-SBBG31 | H2  (n=2) | G | - | T | G | G | G | G | A | T | T |
|  |  | SHA-SBBG25, SHA-SBTS09 | H3  (n=2) | G | GCC | C | C | C | G | G | A | T | - |
|  |  | BRA-SBTG05, BRA-SBNT09,  BRA-SBTG06 | H4  (n=3) | G | GCC | C | C | G | G | G | A | T | - |
| PM weedy rice (n=32) | Awnless | MU018_BR006-KDSL02  MU003_SH008-KDGC01  MU016_BR003-KDSL02  MU049_BR006-KDHK01  MU083_mSH003-KDPD01  MU111_BR002-SPKB01  MU112_BR003-SPKB01  MU116_SH011-SPSD01  MU131_BH002-SPBM01  MU135_BR009-SPBM01  MU139_mSH012-TRGB01  MU143_SH005-TRJH01  MU157_BR005-KNML01  MU227_BR002-SLSB01 | H1  (n=14) | G | GCC | C | C | G | - | G | A | T | - |
|  |  | MU010_BR003-KDGC03 MU004_SH011-KDGC01  MU025_BR003-KDSL01  MU026_BH002-KDSL01  MU036_BR001-KDKM01  MU052_BR009-KDHK01  MU059_BR001-KDHK01  MU066_BH001-PLGH01  MU140_BR005-TRGN01a  MU146_BR003-TRJH01  MU147_BH002-TRJH01  MU179_BR005-KNPB01  MU181_BR016-KNPB01 | H3  (n=13) | G | GCC | C | C | C | G | G | A | T | - |
|  |  | MU006_SH005-KDGC02  MU005_BH001-KDGC01  MU128_BR006-SPBM03  MU141_BR006-TRGN02  MU162_BR016-KNML01 | H4  (n=5) | G | GCC | C | C | G | G | G | A | T | - |
| PM weedy rice (n=31) | Awned | MU011_BRA005-KDGC01  MU027_BHA005-KDSL01  MU073_BRA003-PLPB01  MU130_mSHA012-SPBM01  MU191_BHA004-KNPB01  MU235_BHA004-SLSB01  MU236_BHA006-SLSB01  MU237_BRA009-SLSB01 | H1  (n=8) | G | GCC | C | C | G | - | G | A | T | - |
|  |  | MU040_SHA004-KDKM01  MU058_mSHA007-KDHK01  MU074_SHA006-PLPB01  MU075_SHA014-PLPB01  MU076_SHA017-PLPB01  MU077_SHA018-PLPB01  MU114_mSHA008-SPKB01  MU123_SHA013-SPSD01  MU186_BRA007-KNPB01 | H2  (n=9) | G | - | T | G | G | G | G | A | T | T |
|  |  | MU014_BRA003-KDGC01  MU013_BRA001-KDGC01  MU096_mSHA005-KDPD01  MU177_BRA007-KNMA01  MU242_BRA004-KDGC01 | H3  (n=5) | G | GCC | C | C | C | G | G | A | T | - |
|  |  | MU008_BRA001-KDGC03  MU067_SHA019-PLGH01  MU233_BRA022-SLSB01 | H4  (n=3) | G | GCC | C | C | G | G | G | A | T | - |
|  |  | MU022_BRA007-KDSL01 | H5  (n=1) | G | *-* | C | G | G | G | G | A | T | T |
|  |  | MU023_mSHA018-KDSL01 | H6  (n=1) | A | - | C | G | G | G | G | A | T | T |
|  |  | MU137_BHA016-SPBM01  MU171_BHA001-KNML01  MU189_BHA002-KNPB01  MU234_BHA002-SLSB01 | H7  (n=4) | G | - | C | G | G | G | G | A | A | - |
| Sabah Lr (n=10) | Awnless | IRGC48996, 48998, 49002 | H1  (n=3) | G | GCC | C | C | G | - | G | A | T | - |
|  |  | IRGC48997, 49004, 49006, 49008, 79808, 79814, 79820 | H8  (n=7) | G | GCC | C | C | G | G | T | A | T | - |
| KN (n=14) | Awnless | IRGC17708, 17993, 18093, 48834, 48835, 48837, 48838, 48839, 48840, 18102 | H1  (n=10) | G | GCC | C | C | G | - | G | A | T | - |
|  |  | IRGC48704, 48751 | H4  (n=2) | G | GCC | C | C | G | G | G | A | T | - |
|  |  | IRGC18387, 48693 | H8  (n=2) | G | GCC | C | C | G | G | T | A | T | - |
| JV (n=3) | Awnless | PI373777, 373779, 373790 | H8  (n=3) | G | GCC | C | C | G | G | T | A | T | - |
| PHI (n=3) | Awnless | IRGC79032 | H1  (n=1) | G | GCC | C | C | G | - | G | A | T | - |
|  |  | IRGC96126, 97807 | H8  (n=2) | G | GCC | C | C | G | G | T | A | T | - |
| BN (n=2) | Awnless | IRGC80200, 13763 | H1  (n=2) | G | GCC | C | C | G | - | G | A | T | - |
| PM wild rice (n=7) | Awned | MU239_OR003_Kd | H1  (n=1) | G | GCC | C | C | G | - | G | A | T | - |
|  |  | MU201_OR10_Kd | H10  (n=1) | G | - | C | G | G | G | G | A | T | - |
|  |  | IRGC105491 | H2  (n=1) | G | - | T | G | G | G | G | A | T | T |
|  |  | OR14_Kd, MU208_OR009_Kd | H4  (n=2) | G | GCC | C | C | G | G | G | A | T | - |
|  |  | MU209_OR016_Kel  MU204_OR013_Kel | H5  (n=2) | G | - | C | G | G | G | G | A | T | T |
| SEAOr (n=11) | Awned | IRGC104814, 104818 | H1  (n=2) | G | GCC | C | C | G | - | G | A | T | - |
|  |  | IRGC104869, 104870, 105931, 105939, 104815, 104816 | H5  (n=6) | G | *-* | C | G | G | G | G | A | T | T |
|  |  | IRGC104819 | H9  (n=1) | G | *-* | C | G | G | G | G | T | T | - |
|  |  | IRGC104864, 04867 | H10  (n=2) | G | *-* | C | G | G | G | G | A | T | - |
